# Supplementary material for: Applying Human Factors Engineering Methods for Risk Assessment of a Neonatal Incubator
Source: Hindawi journal article supplement (doi:10.1155/2019/8589727), 2019-01-06
Supplement: f1 [file 8589727.f1.pdf]

|    | Zhang's Heuristics             | Severity rate |    |    |   |   | Number of violations |
|----|--------------------------------|---------------|----|----|---|---|----------------------|
|    |                                | 4             | 3  | 2  | 1 | 0 |                      |
| 1  | Visibility of the system state | 0             | 15 | 24 | 6 | 0 | 45                   |
| 2  | Consistency and Standards      | 0             | 7  | 6  | 4 | 0 | 17                   |
| 3  | Memory                         | 0             | 9  | 4  | 1 | 0 | 14                   |
| 4  | Informative Feedback           | 0             | 1  | 5  | 1 | 0 | 7                    |
| 5  | Users' Language                | 0             | 2  | 2  | 2 | 0 | 6                    |
| 6  | Prevent Error                  | 0             | 5  | 0  | 0 | 0 | 5                    |
| 7  | Clear Closure                  | 0             | 2  | 3  | 0 | 0 | 5                    |
| 8  | Users in Control               | 0             | 3  | 1  | 0 | 0 | 4                    |
| 9  | Help and documentation         | 0             | 2  | 2  | 0 | 0 | 4                    |
| 10 | Flexibility and efficiency     | 0             | 3  | 0  | 1 | 0 | 4                    |
| 11 | Minimalist                     | 0             | 1  | 2  | 0 | 0 | 3                    |
| 12 | Match between system and world | 0             | 0  | 1  | 0 | 0 | 1                    |
| 13 | Error Message                  | 0             | 1  | 0  | 0 | 0 | 1                    |
| 14 | Reversible actions             | 0             | 0  | 0  | 0 | 0 | 0                    |
