# Supplementary material for: Applying Human Factors Engineering Methods for Risk Assessment of a Neonatal Incubator
Source: Hindawi journal article supplement (doi:10.1155/2019/8589727), 2019-01-06
Supplement: f2 [file 8589727.f2.pdf]

|    | Task                                                                                                            | heuristics violated | usability problems |
|----|-----------------------------------------------------------------------------------------------------------------|---------------------|--------------------|
| 1  | Turn on the neonatal incubator                                                                                  | 9                   | 13                 |
| 2  | Connect the skin sensor                                                                                         | 5                   | 3                  |
| 3  | Connect the humidity sensor                                                                                     | 5                   | 5                  |
| 4  | Connect the auxiliary sensor                                                                                    | 1                   | 1                  |
| 5  | Set the skin sensor temperature in 36.4°C                                                                       | 4                   | 2                  |
| 6  | Set humidity in 60%                                                                                             | 4                   | 4                  |
| 7  | Select the trend graphic of air temperature                                                                     | 3                   | 2                  |
| 8  | Verify the trend graphic of skin temperature                                                                    | 4                   | 3                  |
| 9  | Verify the trend graphic of humidity                                                                            | 4                   | 4                  |
| 10 | Set hour and date                                                                                               | 8                   | 6                  |
| 11 | Lock the keyboard                                                                                               | 6                   | 3                  |
| 12 | Write on a paper the hour and date, the humidity and the temperatures of Air Mode, Skin Mode and Auxiliary mode | 3                   | 5                  |
| 13 | Locate the water reservoir compartment                                                                          | 2                   | 1                  |
| 14 | Remove the water reservoir from the compartment                                                                 | 2                   | 2                  |
| 15 | Locate the air filter                                                                                           | 2                   | 1                  |
| 16 | Check air filter replacement date                                                                               | 3                   | 2                  |
| 17 | Adjust trend graphical display in 8h                                                                            | 5                   | 2                  |
| 18 | Identify input for limited oxygen hose                                                                          | 1                   | 1                  |
| 19 | Identify the compartment for the x-ray plate                                                                    | 1                   | 1                  |
| 20 | Locate the button for contrast adjustment of monitor                                                            | 2                   | 2                  |
| 21 | Locate connector for computer cable                                                                             | 2                   | 1                  |
| 22 | Raise the bed at the head height and then at feet height                                                        | 1                   | 1                  |
| 23 | Identify alarms                                                                                                 | 3                   | 2                  |
| 24 | Read the patient's identification card                                                                          | 1                   | 1                  |
| 25 | Identify Air Mode and Skin Mode                                                                                 | 1                   | 1                  |

|    |    |
|----|----|
| 82 | 69 |
|----|----|
